# Supplementary material for: C-reactive protein and ART outcomes: a systematic review
Source: Oxford University Press journal article supplement (doi:10.1093/humupd/dmaa012), 2020-03-09
Supplement: supplementary_table_si_final_dmaa012.docx [file supplementary_table_si_final_dmaa012.docx]

| **Reference** | **Cycle before ART** | **Start of ART cycle** | **Day of ovulation trigger** | **Day of IUI or day of ovarian punture** | **Days 1-5 after IUI or ovarian puncture** | **Days 6-17 after IUI or ovarian puncture** |
| --- | --- | --- | --- | --- | --- | --- |
| Prabhu et al., 2009 | / | / | / | 1.4 ± 0.8 (pre-IUI) vs 1.8 ± 1.1 mg/L (IUI+1) | / | / |
| Tasdemir et al., 2015 | / | / | / | / | ≈ 1 mg/L (IUI+2 and IUI+8) | / |
| Kahyaoglu et al., 2017 | / | 58.3 ± 66.4 mg/L (D-3) | / | / | / | / |
| Sahin et al., 2018 | / | / | ≈ 1.5 mg/L | / | / | ≈ 2 mg/L (D-hCG+8) |
| Almagor et al., 2004 | / | / | / | 6.8 ± 9.5 mg/L | 7.1 ± 7.3 mg/L (D-ET) | 14.6 ± 12.5 mg/L (ET+5-7) *** and ≈ 10 mg/L (ET+12) |
| Sacks et al., 2004 | / | ≈ 0.5 mg/L | / | / | / | ≈ 4 mg/L (D-OP+14) |
| Orvieto et al., 2004 | / | 3.21 ± 4.80 mg/L a | 5.16 ± 4.80 mg/L b | 6.71 ± 5.83 mg/L c | / | / |
| Orvieto et al., 2005 | / | 2.7 ± 2 mg/L a | 2.8 ± 1.7 mg/L a | 4.3 ± 3.3 mg/L b | / | / |
| Wunder et al., 2005 | / | ≈ 1.5 mg/L (D-1) | ≈ 1.3 mg/L | ≈ 3 mg/L * | / | / |
| Levin et al., 2005 | / | / | / | / | / | 7 mg/L (D-hCG+12/13) |
| Levin et al., 2007 | / | ≈ 35 mg/L (D-3 and D-8) | / | ≈ 30 mg/L | / | ≈ 30 mg/L |
| Orvieto et al., 2006 | / | 4.8 ± 3.7 (hCG)a ; 5.4 ± 4.9 mg/L (GnRH)a | 4.9 ± 4.0 (hCG)a ; 6.5 ± 5.8 mg/L (GnRH)a | 9.6 ± 9.1 (hCG)b ; 8.0 ± 6.5 mg/L (GnRH)b | / | / |
| Orvieto et al., 2007 | / | 3.0 ± 2.1 mg/L (agonist); 2.2 ± 1.4 mg/L (antagonist) | 4.8 ± 3.9 mg/L (agonist); 2.6 ± 3.7 mg/L (antagonist) | 8.3 ± 5.3 mg/L (agonist) a ; 4.3 ± 3.6 mg/L (antagonist) b | / | / |
| Robinson et al., 2008 | 1.08 mg/L (IQR 0.43– 3.00) (D-3) | / | / | / | / | / |
| Arefi et al., 2010 | / | 3.97±1.92 mg/L a | 4.94 ± 1.92 mg/L b | ≈ 5.5 mg/L c | 6.61 ± 4.16 mg/L (D-ET)d | / |
| Seckin et al., 2012 | / | ≈ 3.5 mg/L (D-3) a | / | / | / | ≈ 10 mg/L (ET+7) b |
| Liu et al., 2014 | / | 1,204 ± 1,077 mg/L (D-2) a | 1,452 ± 972 mg/L a | / | 2,578 ± 1,607 mg/L (D-ET)b | / |
| Yildizfer et al., 2015 | / | 3.4 ± 0.4 mg/L (D-3) | / | / | / | 7.0 ± 0.8 mg/L (ET+15) |
| Korhonen et al., 2016 | undetectable (mid-luteal phase) | / | / | / | 5 (<3–9) mg/L (OP+2)*** | 3 (<3–6) mg/L (D-OP+7)*, undetectable (D-OP+14) |
| Buyuk et al., 2017 | / | 0.5-3 mg/L (D-3) | / | / | / | / |
| El-shawarby et al., 2005 | 1.283 mg/L (D-2) | / | / | / | / | ≈ 2 mg/L (ET+12) |

**Supplementary Table SI** Circulating C-reactive protein concentrations (in mg/L) in women undergoing ART.

D: day; OP: ovarian puncture; ET: embryo transfer. *p <0.05, ***p <0.001, mean values with different letters (a, b, c, d) are significantly different.
