# Supplementary material for: C-reactive protein and ART outcomes: a systematic review
Source: Oxford University Press journal article supplement (doi:10.1093/humupd/dmaa012), 2020-03-09
Supplement: supplementary_table_sii_final_dmaa012.docx [file supplementary_table_sii_final_dmaa012.docx]

| **Criteria** | | **Decision rule** | **Score** |
| --- | --- | --- | --- |
| SELECTION | Description of the cohort | Inclusion/exclusion criteria are clearly stated | * |
| Inclusion/exclusion criteria are not satisfying or not stated | - |
| Sample size | Justified | * |
| Not justified | - |
| CRP quantification assay | hs-CRP assay | ** |
| Validated CRP assay | * |
| Inadequate LoD or poor description of the measurement tool | - |
| COMPARABILITY | Non-pregnant and pregnant groups are comparable. Confounding factors are controlled. | Women age and BMI are similar in both groups | * |
| The number of mature follicles (in IUI) or the number of transferred embryos (in IVF) is similar in both groups | * |
| Women age, women BMI, and the number of transferred embryos are significanlty different in both groups or not available | - |
| OUTCOME | Assessment of the outcome | Clinical pregnancy | ** |
| Biochemical pregancy | * |
| Pregnancy not defined | - |
| Statistical test | Predictive accuracy is provided: cut-off, AUC, or sensiility/specificity | * |
| Clearly described, appropriate, and indicating the probability level (p value) | * |
| The statistical test is not appropriate, not described or incomplete | - |

**Supplementary Table SII** Modified Newcastle –Ottawa quality assessment scale.

LoD: limit of detection; hsCRP: high-sensitivity C-reactive protein; CRP: C-reactive protein.
