# Supplementary material for: C-reactive protein and ART outcomes: a systematic review
Source: Oxford University Press journal article supplement (doi:10.1093/humupd/dmaa012), 2020-03-09
Supplement: supplementary_table_siii_final_dmaa012.docx [file supplementary_table_siii_final_dmaa012.docx]

| **References** | **Inclusion/Rejection** | **Reason for rejection** |
| --- | --- | --- |
| Tasdemir et al., 2014 | Inclusion | / |
| Kahyaoglu et al., 2017 | **Rejection** | **CRP ˃10mg/L** |
| Sahin et al., 2018 | Inclusion | / |
| Almagor et al., 2004 | Inclusion | / |
| Sacks et al., 2004 | Inclusion | / |
| Wunder et al., 2005 | Inclusion | / |
| Levin et al., 2007 | **Rejection** | **CRP ˃10mg/L** |
| Robinson et al., 2008 | Inclusion | / |
| Arefi et al., 2010 | Inclusion | / |
| Seckin et al., 2012 | Inclusion | / |
| Liu et al., 2014 | **Rejection** | **CRP ˃10mg/L** |
| Yildizfer et al., 2015 | Inclusion | / |
| Buyuk et al., 2017 | Inclusion | / |
| El-shawarby et al., 2005 | **Rejection** | **FET** |

**Supplementary Table SIII** Inclusion or rejection (with reason) of the analyzed studies.

FET: frozen embryo transfer.
