# Supplementary material for: C-reactive protein and ART outcomes: a systematic review
Source: Oxford University Press journal article supplement (doi:10.1093/humupd/dmaa012), 2020-03-09
Supplement: supplementary_table_siv_final_dmaa012.docx [file supplementary_table_siv_final_dmaa012.docx]

| **Reference** | **ART type** | **Pregnant group versus non-pregnant group** | | | |
| --- | --- | --- | --- | --- | --- |
| **n** | **Women age (years)** | **Women BMI (kg/m²)** | **Number of mature follicles (in IUI) Number of transferred embryos (in IVF)** |
| Tasdemir et al., 2014 | IUI | 8 vs 34 | 23.75 ± 5.97 vs 29.08 ± 5.51 * | 23.4 ± 2 vs 24.9 ± 2.9 (ns) | 2 (1– 2) vs 2 (1– 8) (ns) |
| Sahin et al., 2018 | IUI | 28 vs 35 | 25.5 ± 5.7 vs 29.2 ± 5.4 * | 23.8 ± 2.1 vs 24.8 ± 3.2 (ns) | 2 (1-4) vs 2 (1-8) (ns) |
| Almagor et al., 2004 | IVF | 22 vs 50 | 29.8 ± 6.5 vs 32.8 ± 6.4 (ns) | NA | NA |
| Sacks et al., 2004 | IVF | 40 vs 95 | 34.13 (3.80) vs 37.03 (4.29) *** | 23.5 (19±35)vs 23 (19±35) (ns) | 2 (1-3) vs 2 (2-3) (ns) |
| Wunder et al., 2005 | IVF | 47 vs 102 | 31.2 ± 4.3 vs 33.7 ± 3.1 *** | 23.8 ± 3.1 vs 23.6 ± 3.7 (ns) | 1.98 ± 0.39 vs 1.91 ± 0.38 (ns) |
| Robinson et al., 2008 | IVF | 41 vs 65 | NA | 26.3 ± 3.15 vs 25.0 ± 2.68 (ns) | NA |
| Arefi et al., 2010 | IVF | 30 vs 40 | 31.04 ± 2.99 vs 29.96 ± 1.94 (ns) | NA | 3.1 ± 0.9 vs 2.9 ± 1.13 (ns) |
| Seckin et al., 2012 | IVF | 35 vs 34 | 29.1 ± 4.8 vs 29.4 ± 3.6 (ns) | 25.9 ± 3.9 vs 25.3 ± 4.0 | 3 (1–3) vs 3 (1–3) (ns) |
| Yildizfer et al., 2015 | IVF | 8 vs 18 | 33.2 ± 1.5 vs 31.3 ± 1.3 (ns) | 24.9 ± 2.9 vs 25.8 ± 1.7 (ns) | 2.2 ± 0.3 vs 2.0 ± 0.2 (ns) |
| Buyuk et al., 2017 | IVF | 11 vs 17 | 34.7 ± 1.0 vs 38.4 ± 0.8 * | 26.1 ± 1.6 vs 26.8 ± 1.1 | NA |

**Supplementary Table SIV** Clinical and biological characteristics of the ART cycles in the included studies.

Data are presented as mean ± SD or median (range). *p value < 0.05, ***p value < 0.001, ns: not significant, NA: not available.
